# Supplementary material
Source: publisher site journal article supplement (https://www.dovepress.com/article/544316)
Supplement: Supplementary file 1 [file 544316%20Revised%20Supplementary%20Table%201.docx]

| **Table S1.** Sequences of primers used for RT-qPCR. | | |
| --- | --- | --- |
| **Primer** | **Forward (5'-3')** | **Reverse (5'-3')** |
| FOSB | TCTGTCTTCGGTGGACTCCTTC | GTTGCACAAGCCACTGGAGGTC |
| RELB | TCCTGTTCGAGTCTCCATGCAG | GGTCTCATAGGTCCTTTTGCGC |
| IL1B | TGGACCTTCCAGGATGAGGACA | GTTCATCTCGGAGCCTGTAGTG |
| MAP3K7 | CTGATGAAGGGCAGAGCAACTC | GTCGTTTGTGGCAGGAACCTGT |
| PPP3R1 | GCCTGAGTTACAGCAGAACCCT | CCTCAACTTCTGTTCCTTATCGC |
| TNF | GGTGCCTATGTCTCAGCCTCTT | GCCATAGAACTGATGAGAGGGAG |
| TGFBR2 | CCTACTCTGTCTGTGGATGACC | GACATCCGTCTGCTTGAACGAC |
| SOSCS3 | GGACCAAGAACCTACGCATCCA | CACCAGCTTGAGTACACAGTCG |
